# Supplementary material for: Co-Occurring Conduct Problems and Anxiety: Implications for the Functioning and Treatment of Youth with Oppositional Defiant Disorder
Source: MDPI journal article supplement (doi:10.3390/ijerph20043405), 2023-02-15
Supplement: s1 [file s1]

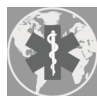

## Supplement

### Method

#### *Diagnostic interview*

Separate interviews were conducted with the parents (ADIS-P) and the child (ADIS-C) by trained-to-criterion clinicians. Diagnoses were generated through a consensus based on information from both interviews. All interviews were videotaped and 20% were reviewed by a second clinician to compute Kappa coefficients. Using Cohen's Kappa, agreement on diagnoses was .77, .85, and .86, on primary, secondary, and tertiary diagnoses, respectively. An ODD diagnosis based the ADIS-C/P has been found to be reliable and valid [58].

#### *Statistical Analysis*

In the initial step of latent profile analysis (LPA), a one-class model is examined. In subsequent steps, profiles are added one at a time until there is no additional improvement to the fit of the model [59,60]. The optimal number of profiles was determined based on a variety of fit indices, the interpretability of each class on the basis of mean indicator scores, and our conceptual model. The Akaike Information Criterion (AIC) [50], Bayesian Information Criterion (BIC) [51], and sample size adjusted BIC (ABIC) [52], were used to assess the model's fit to the data, with lower values between successive models indicating better fit. The Bootstrap Likelihood Ratio Test (BLRT) was used to explore whether model fit significantly improved based on the addition of another class [59,60]. Specifically, BLRT examines whether the model with  $k$  classes provides a better fit to the data than the model with  $k-1$  classes. A significant BLRT suggests that the current model has a better fit than the prior model with one fewer class.

In terms of fit indices, Monte Carlo simulations indicate that BIC and BLRT are the most robust indicators of model fit to the data and optimal number of classes to select [60] and were therefore relied on heavily when selecting the best-fitting model. Following the model selection, the latent class posterior probabilities for each observation obtained during this step-wise procedure were used to create a nominal value indicating the class to which each child most likely belonged.

Full Information Maximum Likelihood (FIML) estimation was used to address missing data. FIML uses all available data to estimate model parameters, but does not impute values. This approach generates smaller errors in parameter estimates and standard errors relative to other missing data strategies.

### Supplement Tables

**Table S1.** Assessment measures by informant and internal consistency of the subscales.

| Informant              | Variable         | Measurement | Cronbach's alpha/Kuder-Richardson reliability coefficient |
|------------------------|------------------|-------------|-----------------------------------------------------------|
| Profile Classification |                  |             |                                                           |
| Parents                | Conduct Problems | BASC-2      | Maternal 0.857; paternal 0.868                            |
|                        | Anxiety          | BASC-2      | Maternal 0.860; paternal 0.901                            |
| Teacher                | Conduct Problems | BASC-2      | 0.904                                                     |
|                        | Anxiety          | BASC-2      | 0.831                                                     |
| Child                  | ODD Symptoms     | DBDRS       | 0.788                                                     |
|                        | Anxiety          | BYI         | 0.915                                                     |
| External Validators    |                  |             |                                                           |
| Clinician              | ODD Diagnosis    | ADIS        | -                                                         |

|         |                        |        |                                |
|---------|------------------------|--------|--------------------------------|
| Parents | Anxiety Diagnosis      | ADIS   | -                              |
|         | Global Functioning     | CGAS   | -                              |
|         | ODD Symptoms           | DBDRS  | Maternal 0.822; paternal 0.866 |
|         | CD Symptoms            | DBDRS  | Maternal 0.582; paternal 0.639 |
|         | Aggression             | BASC-2 | Maternal 0.837; paternal 0.830 |
|         | Emotional Self-Control | BASC-2 | Maternal 0.778; paternal 0.775 |
|         | Emotional Lability     | ERC    | Maternal 0.775; paternal 0.822 |
|         | Proactive Aggression   | CBRS   | Maternal 0.797; paternal 0.793 |
|         | Reactive Aggression    | CBRS   | Maternal 0.578; paternal 0.734 |
| Teacher | Executive Functioning  | BRIEF  | Maternal 0.952; paternal 0.968 |
|         | Aggression             | BASC-2 | 0.921                          |
|         | School Problems        | BASC-2 | 0.677                          |
|         | Learning Problems      | BASC-2 | 0.846                          |
| Child   | Study Skills           | BASC-2 | 0.870                          |
|         | Proactive Aggression   | CBR    | 0.745                          |
|         | Reactive Aggression    | CBR    | 0.714                          |
|         | Self-Concept           | BYI    | 0.927                          |

Note: ADIS = Anxiety Disorders Interview Schedule for DSM-IV, Child and Parent Versions; BASC-2 = Behavior Assessment System for Children, Second Edition; BRIEF = Behavior Rating Inventory of Executive Function; BYI = Beck Youth Inventory; CBRS = Child Behavior Rating Scale; CGAS = Child Global Assessment Scale; DBDRS = Disruptive Behavior Disorders Rating Scale; ERC = Emotion Regulation Checklist.

**Table S2.** Means, standard deviations, range, and zero-order correlations among classification variables.

| Variable                           |           | M     | SD    | Range  | 1      | 2     | 3     | 4     | 5      | 6      | 7     | 8 |
|------------------------------------|-----------|-------|-------|--------|--------|-------|-------|-------|--------|--------|-------|---|
| Maternal-reported anxiety          | Raw score | 14.80 | 7.10  | 0-35   | 1      |       |       |       |        |        |       |   |
|                                    | T-score   | 53.29 | 11.97 | 28-87  |        |       |       |       |        |        |       |   |
| Paternal-reported anxiety          | Raw score | 14.33 | 7.57  | 0-31   | 0.63** | 1     |       |       |        |        |       |   |
|                                    | T-score   | 52.48 | 12.80 | 28-80  |        |       |       |       |        |        |       |   |
| Teacher-reported anxiety           | Raw score | 3.40  | 3.23  | 0-12   | 0.24** | 0.19* | 1     |       |        |        |       |   |
|                                    | T-score   | 49.82 | 11.03 | 38-79  |        |       |       |       |        |        |       |   |
| Self-reported anxiety              | Raw score | 12.71 | 9.47  | 0-52   | 0.08   | 0.10  | -0.02 | 1     |        |        |       |   |
|                                    | T-score   | 45.44 | 9.59  | 31-86  |        |       |       |       |        |        |       |   |
| Maternal-reported conduct problems | Raw score | 12.53 | 4.74  | 4-24   | 0.07   | -0.13 | -0.09 | 0.12  | 1      |        |       |   |
|                                    | T-score   | 71.42 | 12.87 | 48-103 |        |       |       |       |        |        |       |   |
| Paternal-reported conduct problems | Raw score | 11.08 | 4.88  | 0-24   | 0.03   | 0.03  | -0.13 | 0.18* | 0.67** | 1      |       |   |
|                                    | T-score   | 67.42 | 13.34 | 37-103 |        |       |       |       |        |        |       |   |
| Teacher-reported conduct problems  | Raw score | 6.43  | 5.26  | 0-21   | -0.15* | 0.11  | -0.06 | 0.01  | 0.30** | 0.22** | 1     |   |
|                                    | T-score   | 51.98 | 21.21 | 0-93   |        |       |       |       |        |        |       |   |
| Self-reported conduct problems     | Raw score | 7.08  | 5.54  | 0-24   | 0.11   | 0.07  | -0.05 | 0.15* | -0.00  | -0.10  | -0.08 | 1 |

\* $p < .05$ ; \*\* $p < .01$ .

**Table S3.** Symptom scores across the four-profile model.

|                                    | Profile 1<br><i>n</i> = 42 |      | Profile 2<br><i>n</i> = 33 |       | Profile 3<br><i>n</i> = 40 |       | Profile 4<br><i>n</i> = 19 |       |
|------------------------------------|----------------------------|------|----------------------------|-------|----------------------------|-------|----------------------------|-------|
|                                    | M                          | SD   | M                          | SD    | M                          | SD    | M                          | SD    |
| Maternal-reported anxiety          | 7.73                       | 5.66 | 18.79                      | 7.27  | 16.26                      | 8.00  | 15.79                      | 12.03 |
| Paternal-reported anxiety          | 6.31                       | 5.96 | 24.32                      | 5.52  | 14.32                      | 6.05  | 13.34                      | 5.00  |
| Teacher-reported anxiety           | 1.96                       | 3.63 | 3.28                       | 3.85  | 4.59                       | 6.28  | 3.73                       | 6.97  |
| Self-reported anxiety              | 11.18                      | 8.96 | 12.63                      | 11.27 | 9.84                       | 10.71 | 17.71                      | 17.45 |
| Maternal-reported conduct problems | 11.94                      | 7.82 | 11.34                      | 4.61  | 10.99                      | 8.87  | 19.31                      | 4.97  |
| Paternal-reported conduct problems | 10.61                      | 6.60 | 11.92                      | 5.49  | 8.23                       | 6.16  | 18.30                      | 8.24  |

---

|                                   |      |      |      |      |      |       |       |       |
|-----------------------------------|------|------|------|------|------|-------|-------|-------|
| Teacher-reported conduct problems | 6.43 | 9.32 | 6.32 | 8.83 | 3.78 | 12.53 | 11.81 | 10.63 |
| Self-reported conduct problems    | 8.34 | 6.74 | 6.30 | 5.96 | 4.97 | 8.06  | 9.15  | 14.16 |

---
